# Supplementary material
Source: PubMed Central journal article supplement (PMC6937570)
Supplement: supp_RA119.009438_152963_2_supp_430891_q15zd9.pdf [file supp_RA119.009438_152963_2_supp_430891_q15zd9.pdf]

## **Supporting Information**

**Fidelity of prespacer capture and processing is governed by the PAM mediated interactions of Cas1-2 adaptation complex in CRISPR-Cas type I-E system**

**Kakimani Nagarajan Yoganand, Manasasri Muralidharan, Siddharth Nimkar, and Baskaran Anand\***

Department of Biosciences and Bioengineering, Indian Institute of Technology Guwahati,  
Guwahati 781039, INDIA

\* To whom correspondence should be addressed.

Tel: +91-361-2582223; Fax: +91-361-2582249; Email: [banand@iitg.ac.in](mailto:banand@iitg.ac.in)

Supporting figures

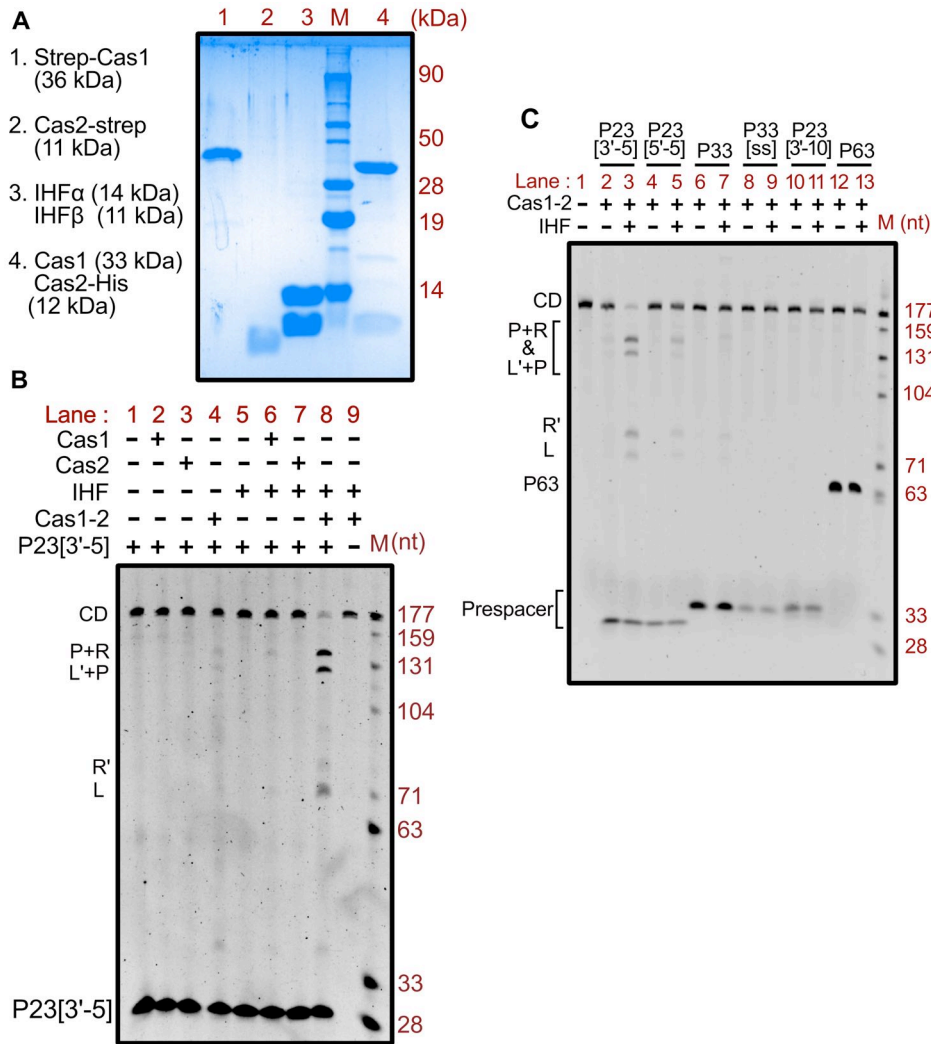

**Figure S1. Cas1-2 complex formation necessitates the integration of prespacers into CRISPR DNA.** (A) 17% SDS-PAGE displays the purified Cas1, Cas2, IHF and Cas1-2. Molecular weight (in kDa) corresponding to proteins in each lane is shown on the left. The molecular weight marker (M) positions are shown on the right. (B) Post-stained denaturing gel displaying the samples of spacer integration assay is shown. Absence (-) or presence (+) of Cas1, Cas2, IHF, Cas1-2 and prespacer P23[3'-5'] is indicated on top of each lane. Positions of bands corresponding to CRISPR DNA (CD), prespacer (P23[3'-5]) and the DNA fragments that are generated due to prespacer nucleophilic attack and integration (L, R', L'+P and P+R) are displayed. The DNA molecular weight marker (M) positions are shown on the right. Appearance of DNA fragments that are the resultant of prespacer integration in presence of Cas1-2, IHF, prespacer and CD (lane 8) highlights the indispensability of these components. (C) Post-stained denaturing gel displaying the samples of spacer integration assay that involves various types of prespacers (Figure 1B) and CRISPR DNA is presented. The type of prespacers utilized in each reaction is depicted on top of the respective lanes. Appearance of DNA fragments that correspond to prespacer integration (L, R', L'+P and P+R) in the samples that contain P23[3'-5'] (lane 3), P23[5'-5'] (lane 5) and P33 (lane 7) alone, indicates the necessity of prespacer length to be 33 nt.

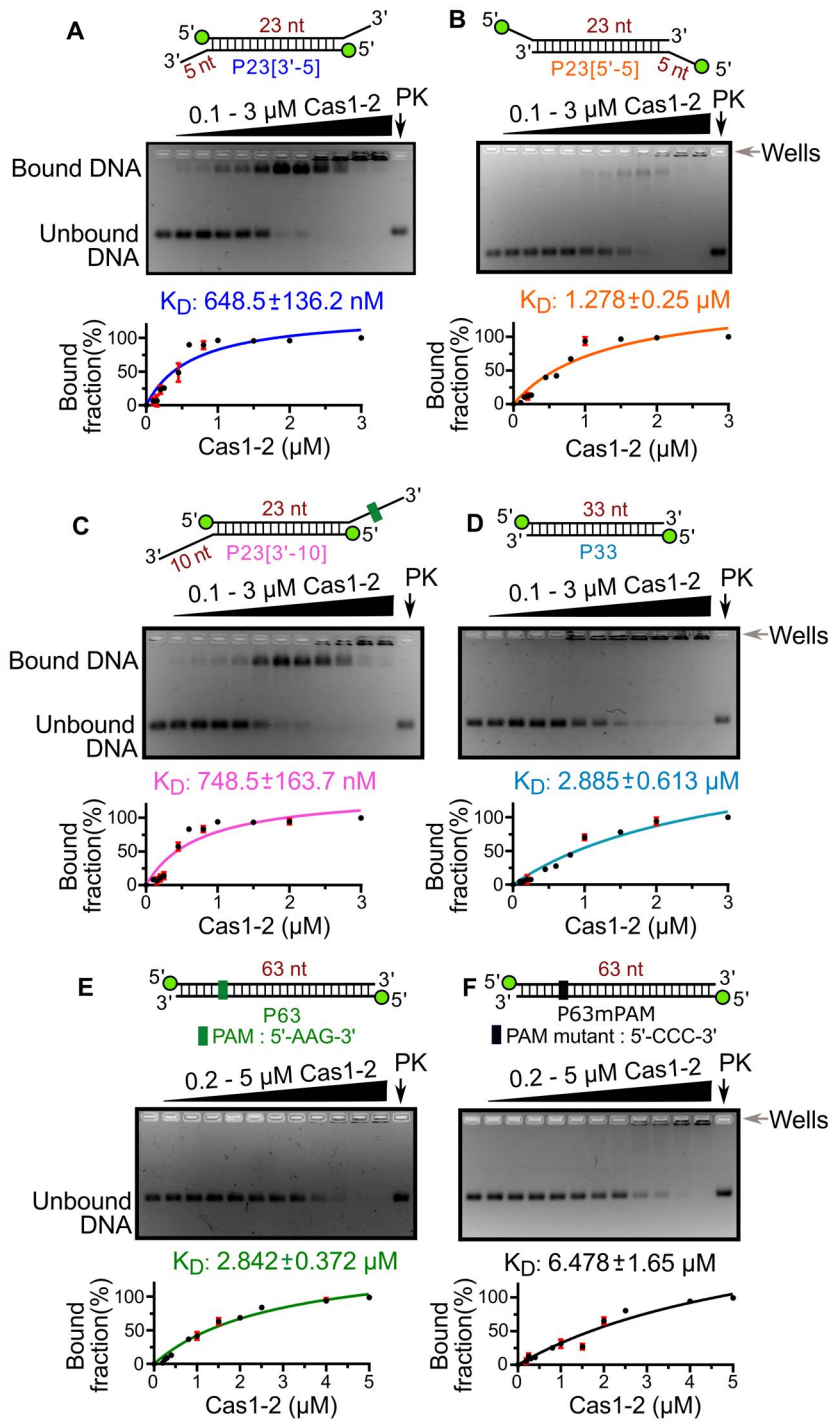

**Figure S2. Cas1-2 interacts with prespacers of varied lengths.** (A-F) Representative agarose gels depicting the interactions of Cas1-2 with 5'-FAM labelled prespacers P23[3'-5] (A), P23[5'-5] (B), P23[3'-10] (C), P33 (D), P63 (E) and P63mPAM (F) are displayed. Schematic representation of the prespacer and the positions of bound and unbound prespacers are shown at the respective gel images. 100 nM of each prespacer DNA (P23[3'-5], P23[5'-5], P23[3'-10] and P33) was incubated with increasing concentrations of Cas1-2 (0, 0.1, 0.15, 0.2, 0.25, 0.45, 0.6, 0.8, 1, 1.5, 2 and 3 μM). In case of prespacers P63 and P63mPAM, 100 nM of DNA was incubated with 0, 0.2, 0.25, 0.3, 0.4, 0.8, 1, 1.5, 2, 2.5, 4 and 5 μM of Cas1-2. The 3'- and 5'-tailed duplex prespacers (A-C) showed a slow migrating Cas1-2-prespacer complex with increasing concentrations of Cas1-2. However, at higher Cas1-2 concentrations, we observed a supershift of DNA in the wells presumably due to the accumulation of DNA-protein aggregates (A-C). In the binding assays that employ blunt prespacers P33, P63 and P63mPAM (D-F), a reduction in prespacer band intensity was observed with increasing concentrations of Cas1-2. In line with previous studies (1), only DNA-protein aggregates were detected in the wells when blunt prespacers were incubated with Cas1-2 (P33, P63 and P63mPAM (D-F)). To further verify the presence of Cas1-2-prespacer complex, aliquots of the samples that contains the mixture of 100 nM prespacer and 3 μM Cas1-2 was treated with proteinase K and the release of intact prespacer was detected (lane PK in A-F). Plots of the bound fraction of prespacer (%) against Cas1-2 concentration (μM) and the estimated  $K_D \pm SD$  values from the binding experiments (in triplicates) are depicted at the bottom of the respective gels in (A-F).

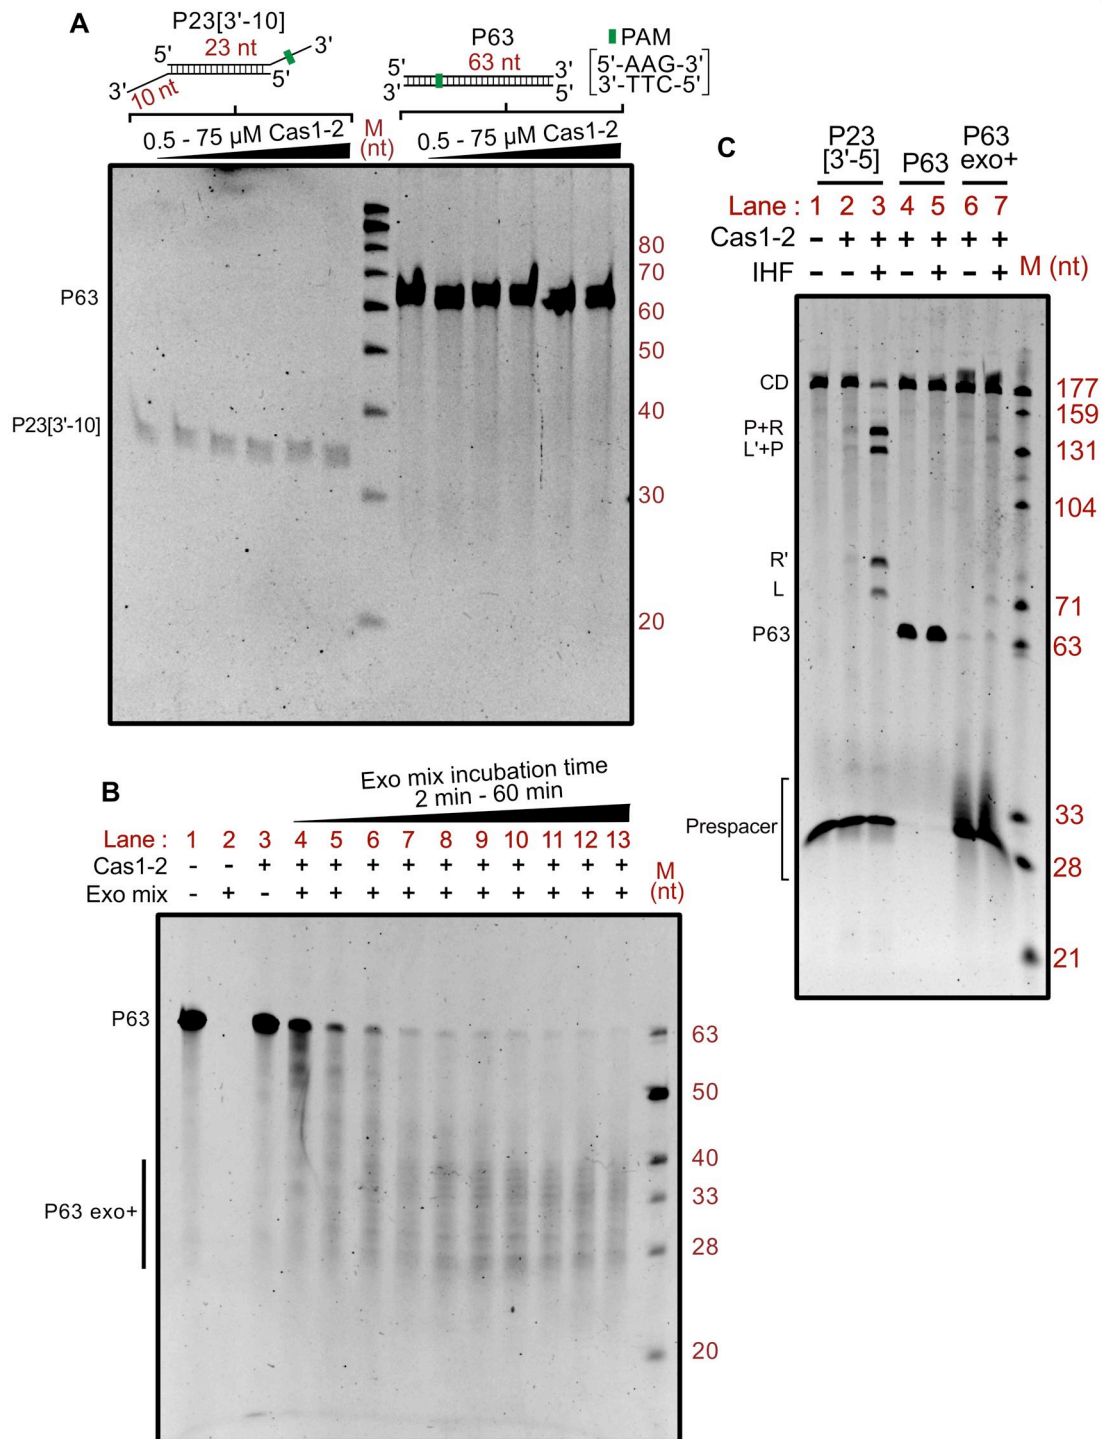

**Figure S3. Cas1-2 protects the prespacer boundaries from exonuclease action.** (A) Denaturing PAGE depicting the interaction of 0.5  $\mu$ M of prespacer DNA (P23[3'-10] and P63) with increasing concentrations of Cas1-2 (0, 0.5, 5, 10, 25 and 75  $\mu$ M) is presented. Pictorial depiction of P23[3'-10] and P63 is displayed above their respective lanes. Positions corresponding to each of the prespacer DNA and oligo marker (M) are shown on the sides of the gel. Though P23[3'-10] and P63 were capable of binding to Cas1-2 (Figure S2), generation of smaller DNA fragments was not observed with increasing concentrations of Cas1-2. These observations highlight that Cas1-2 by itself is inept in processing the prespacers. (B) Denaturing PAGE depicting the time-dependent nuclease treatment of Cas1-2 bound P63 DNA fragments is displayed. Presence (+) or absence (-) of each reaction component is labelled on top of each lane. Positions corresponding to the substrate (P63) and T5 exo/ExoIII digested DNA fragments (P63exo+) are indicated on the left side, whereas, oligo marker (M) positions are shown on the right. Here the sample containing 0.5  $\mu$ M of P63 and 6  $\mu$ M Cas1-2 was treated with exonuclease mixture (T5 exo + ExoIII (3 units each per 20  $\mu$ l)) for various time points (lanes 4-13: 2,

---

5, 10, 15, 20, 25, 30, 40, 50 and 60 min). With increase in incubation time, we observed the conversion of P63 to P63exo+ products (~ 33nt). (C) Denaturing gel displaying the integration reactions employing various prespacers (P23[3'-5] (lanes 1-3), P63 (lanes 4 and 5) and Cas1-2 protected DNA fragments (P63exo+) (lanes 6 and 7)) is shown. Presence (+) or absence (-) of each reaction component is labelled on top of each lane. Positions of the DNA fragments corresponding to the integration products (L, R', P+R and L'+P) and the prespacers are displayed on the left. DNA molecular weight marker (M) positions are shown on the right. Appearance of DNA bands corresponding to the nucleophilic attack and prespacer ligation upon employing P63exo+ (lane 7) indicates that the DNA regions protected by Cas1-2 during exonuclease digestion could act as prespacer during CRISPR adaptation.

---

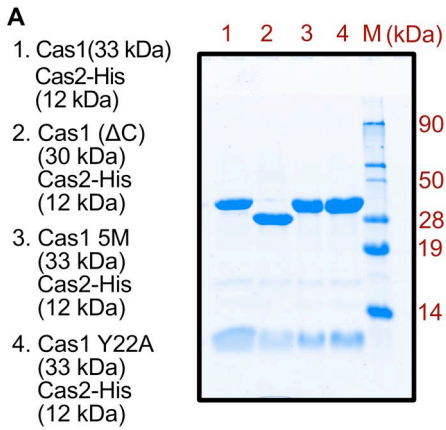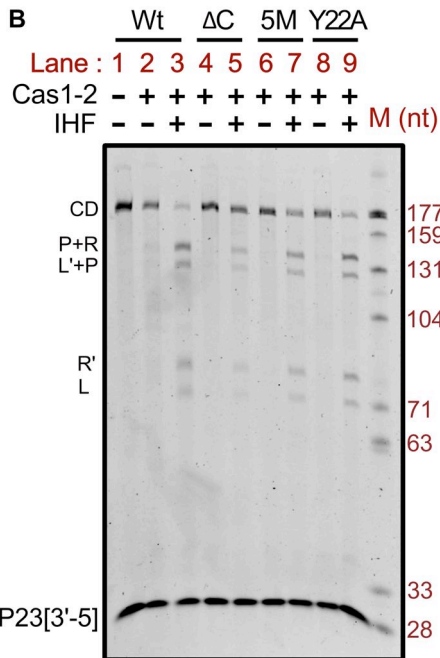

**Figure S4. Wt,  $\Delta$ C, 5M and Y22A display prespacer integration into CRISPR DNA.** (A) 17% SDS-PAGE displaying purified Wt,  $\Delta$ C, 5M and Y22A is shown. Molecular weight (kDa) corresponding to proteins in each lane is shown on the left. Protein molecular weight marker (M) positions are shown on the right. (B) Ethidium bromide stained denaturing PAGE displaying the samples of spacer integration assay that involves Wt,  $\Delta$ C, 5M and Y22A variants of Cas1-2 is shown. Absence (-) or presence (+) of Cas1-2 and IHF in integration reaction is indicated on top of the respective lane. DNA positions corresponding to CRISPR DNA (CD), prespacer (P23[3'-5]) and prespacer integration products (L, R', L'+P and P+R) are represented on the left, whereas, DNA molecular weight marker (M) positions are shown on the right side. The appearance of DNA bands corresponding to prespacer nucleophilic attack (L and R') and ligation (L'+P and P+R) in the samples containing IHF and Cas1-2 variant is indicative of integration activity displayed by each variant (Lanes 3, 5, 7 and 9).



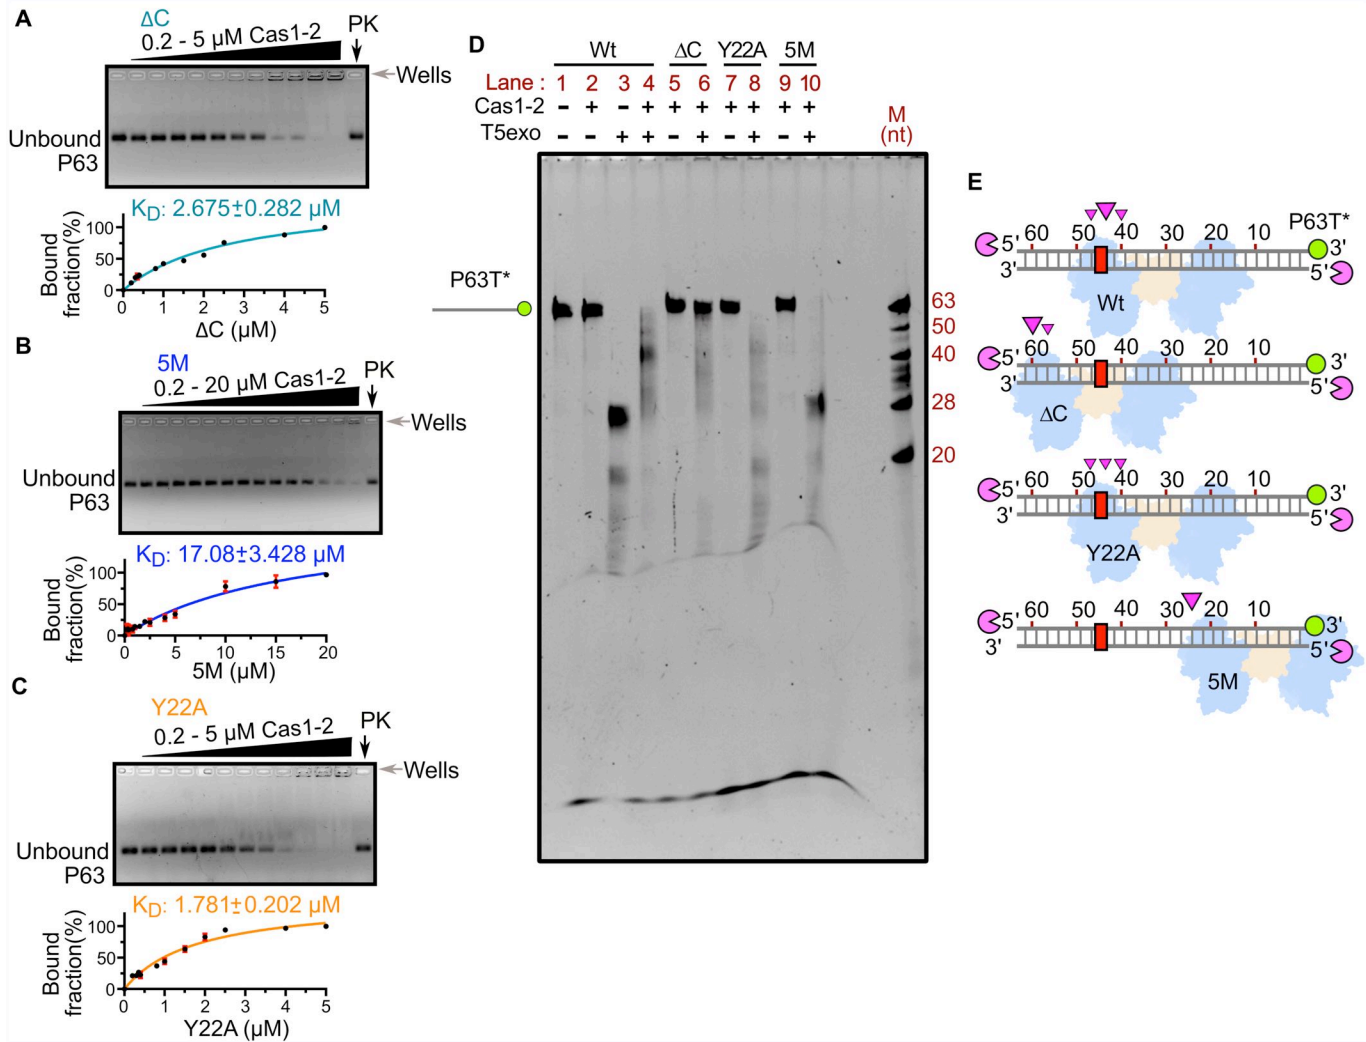

**Figure S5. Cas1-2 variants display differing specificities towards prespacers.** (A-C) Representative agarose gels depicting the interactions of  $\Delta C$  (A), 5M (B) and Y22A (C) with 5'-FAM labelled prespacer P63 are displayed. The variant of Cas1-2 employed and the position of unbound prespacers are shown in the respective images. 100 nM of P63 was incubated with increasing concentrations of  $\Delta C$  (A) or Y22A (C) (0.2, 0.3, 0.35, 0.4, 0.8, 1, 1.5, 2, 2.5, 4 and 5  $\mu M$ ) or 5M (B) (0.2, 0.3, 0.35, 0.4, 0.8, 1, 1.5, 2, 2.5, 4, 5, 10, 15 and 20  $\mu M$ ). As observed in Wt-P63 binding assay (Figure S2E), we noted a reduction in P63 DNA intensity and the appearance of DNA-protein aggregates in the wells with an increase in protein concentration. To further verify the presence of Cas1-2-prespacer complex, aliquots of the samples containing a mixture of 100 nM prespacer and 5  $\mu M$  Cas1-2 variant were treated with proteinase K and the release of intact prespacer was noted (lane PK in A-C). Plots of the bound fraction of prespacer (%) against protein concentration ( $\mu M$ ) and the estimated  $K_D \pm SD$  values from the binding experiments (in triplicates) are depicted at the bottom of the respective gels in (A-C). (D) Denaturing gel depicting the T5exo treatment of Cas1-2 (Wt (lanes 1-4) or  $\Delta C$  (lanes 5-6) or Y22A (lanes 7-8) or 5M (lanes 9-10)) bound fluorescein labelled P63T\* is displayed. Presence (+) or absence (-) of each reaction component is labelled on top of each lane. Position of P63T\* labelled DNA fragment is shown on the left, whereas, oligo marker (M) positions are indicated on the right. (E) Schematic illustration depicting the footprinting assay performed in (D) is displayed. DNA substrate P63T\* (grey ladder), positions of 3' fluorescein label (green circle) and PAM region (red rectangle) are pictorially represented. Numbering on the DNA represents the distance (in nt) of a particular position from the labelled end. T5 exo (magenta pie) is represented at the susceptible 5'-ends of the DNA substrate. Positions of T5exo stalling points (magenta triangles) and binding sites of each variant of Cas1-2 (Wt or  $\Delta C$  or Y22A or 5M in blue and brown blobs) that are estimated from nuclease footprinting assay performed in (D) are indicated.





---

reference, positions of various secondary structural elements were mapped onto the sequence alignment by ESript (2). Region corresponding to the C-terminal tail is displayed in green box, whereas, secondary structural features such as alpha helix ( $\alpha$ ), beta strands ( $\beta$ ),  $3_{10}$  helices ( $\eta$ ) and beta turns (TT) are depicted at the predicted positions. Amino acid residues that are completely conserved are highlighted in red, whereas, partially conserved residues are boxed and depicted in red font.

---



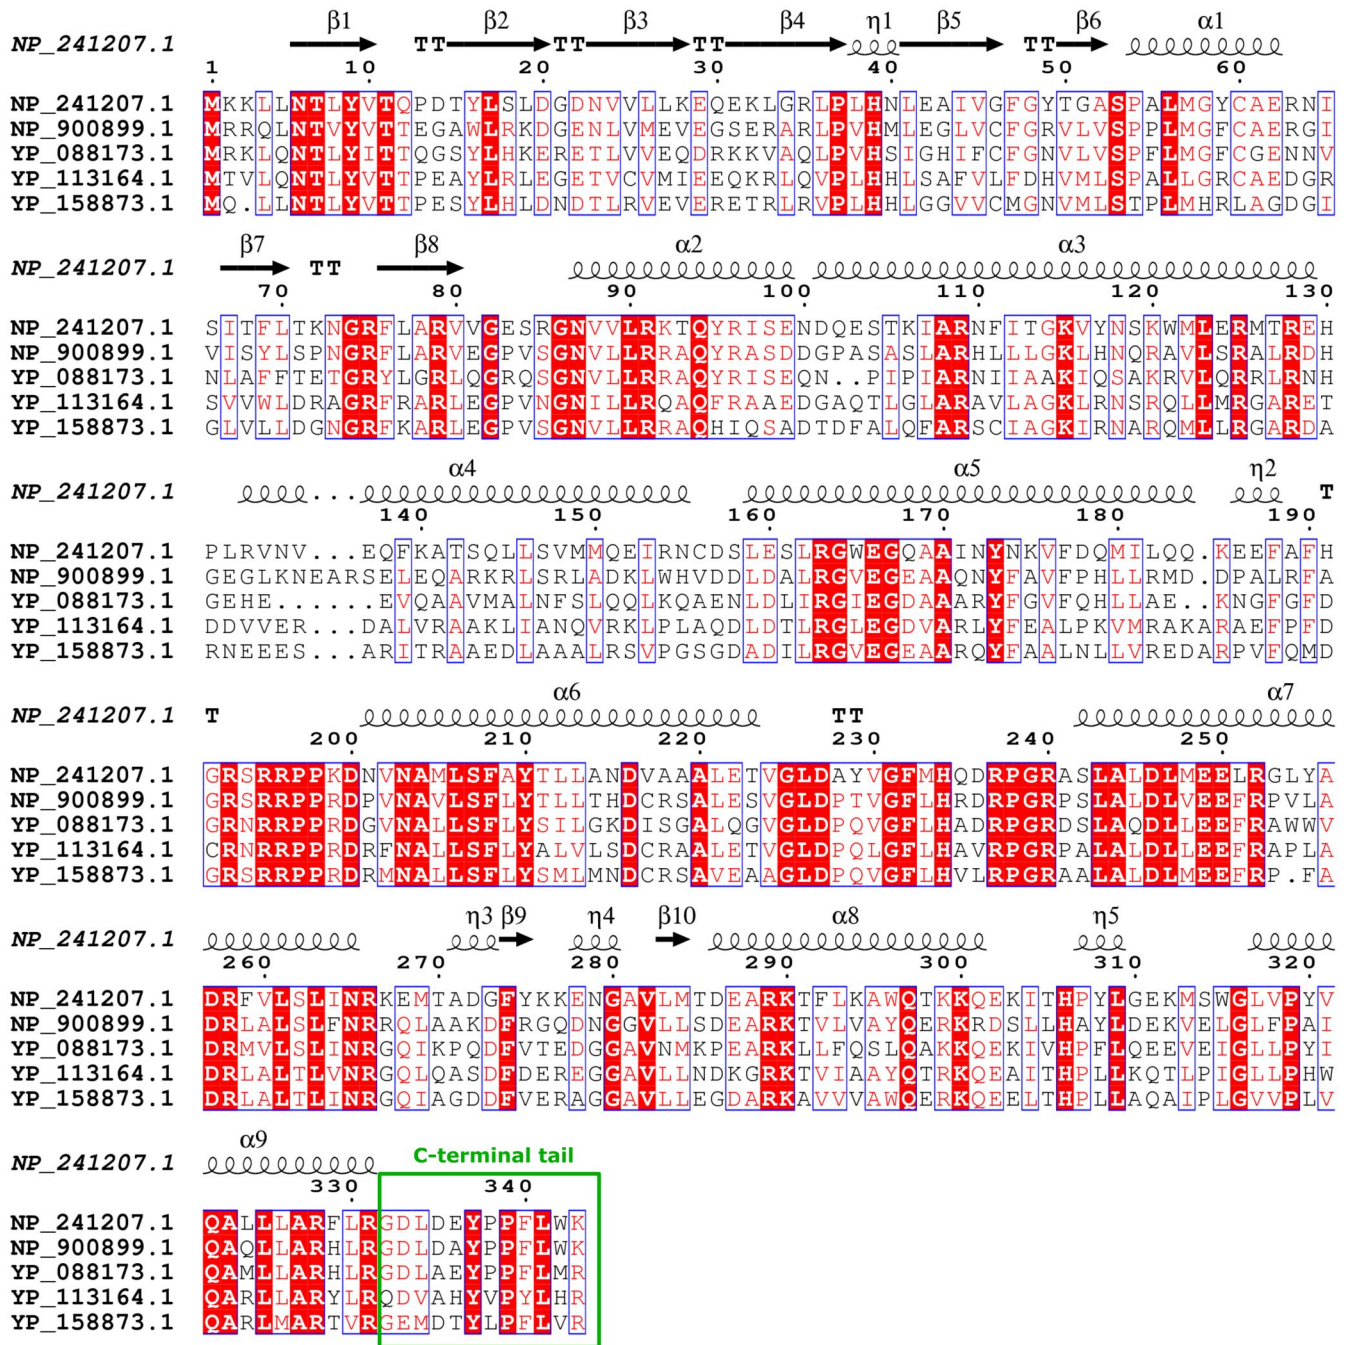

**Figure S8. Multiple sequence alignment of Cas1/I-C.** A representative sequence alignment of Cas1 derived from *Bacillus halodurans* C-125 (NP\_241207.1), *Chromobacterium violaceum* ATCC 12472 (NP\_900899.1), *Mannheimia succiniciproducens* MBEL55E (YP\_088173.1), *Methylococcus capsulatus* str. Bath (YP\_113164.1) and *Aromatoleum aromaticum* EbN1 (YP\_158873.1) is displayed. A comprehensive sequence alignment of 129 type I-C Cas1 homologs is provided as Supplementary data file F3. Using Cas1 structure (predicted using I-TASSER) from *B. halodurans* C-125 as a reference, positions of various secondary structural elements were mapped onto the sequence alignment by ESript (2). Region corresponding to the C-terminal tail is displayed in green box, whereas, secondary structural features such as alpha helix ( $\alpha$ ), beta strands ( $\beta$ ),  $3_{10}$  helices ( $\eta$ ) and beta turns (TT) are depicted at the predicted positions. Amino acid residues that are completely conserved are highlighted in red, whereas, partially conserved residues are boxed and depicted in red font.



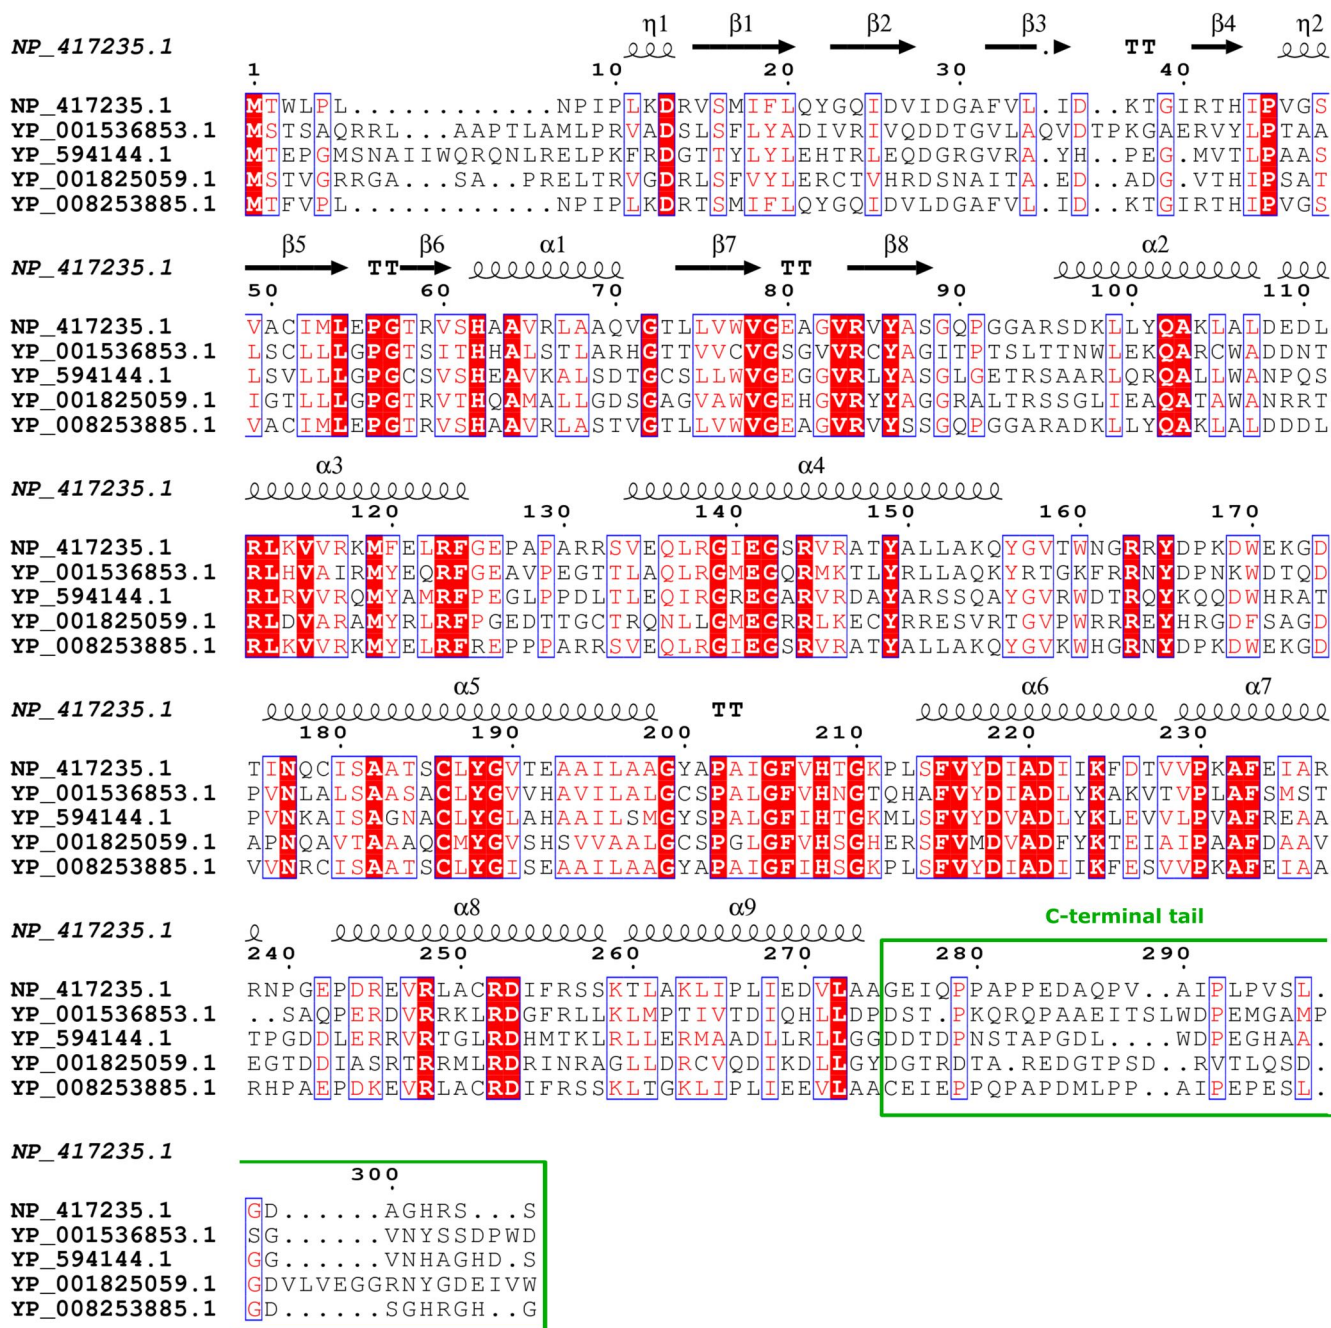

**Figure S9. Multiple sequence alignment of Cas1/I-E.** A representative sequence alignment of Cas1 derived from *Escherichia coli* str. K-12 substr. MG1655 (NP\_417235.1), *Salinispora arenicola* CNS-205 (YP\_001536853.1), *Deinococcus geothermalis* DSM 11300 (YP\_594144.1), *Streptomyces griseus* subsp. griseus NBRC 13350 (YP\_001825059.1) and *Salmonella enterica* subsp. enterica serovar Typhimurium var. 5- str. CFSAN001921 (YP\_008253885.1) is displayed. A comprehensive sequence alignment of 116 type I-E Cas1 homologs is provided as Supplementary data file F4. Using Cas1 structure (PDB ID: 5DQZ) from *E. coli* str. K-12 substr. MG1655 as a reference, positions of various secondary structural elements were mapped onto the sequence alignment by ESript (2). Region corresponding to the C-terminal tail is displayed in green box, whereas, secondary structural features such as alpha helix ( $\alpha$ ), beta strands ( $\beta$ ),  $3_{10}$  helices ( $\eta$ ) and beta turns (TT) are depicted at the predicted positions. Amino acid residues that are completely conserved are highlighted in red, whereas, partially conserved residues are boxed and depicted in red font.



### Supporting tables

| <b>Table S1: Bacterial strains used in the study</b> |                                                                                                                                                       |            |
|------------------------------------------------------|-------------------------------------------------------------------------------------------------------------------------------------------------------|------------|
| <i>E. coli</i> strain                                | Genotype                                                                                                                                              | Source     |
| IYB5101                                              | $F^- \Delta(araD-araB)567 \Delta lacZ4787 (::rrnB-3) \lambda^- rph-1 \Delta(rhaD-rhaB)568 hsdR514 araB::T7-RNAP-tetA, tet^f$                          | (3)        |
| DH5 $\alpha$                                         | $F^- \Phi80lacZ\Delta M15 \Delta(lacZYA-argF) U169 recA1 endA1 hsdR17(r_k^-, m_k^+) phoA supE44 thi-1 gyrA96 relA1 \lambda^-$                         | Invitrogen |
| TOP10                                                | $F^- mcrA \Delta(mrr-hsdRMS-mcrBC) \phi80lacZ\Delta M15 \Delta lacX74 recA1 araD139 \Delta(araleu)7697 galU galK rpsL (str^r) endA1 nupG$             | Invitrogen |
| BL21(DE3)                                            | $F^- fhuA2 [lon] ompT gal (\lambda DE3) [dcm] \Delta hsdS \lambda DE3 = \lambda sBamHI \Delta EcoRI-B int::(lacI::PlacUV5::T7 gene1) i21 \Delta nin5$ | NEB        |

| <b>Table S2: Plasmids used in the study</b> |                                                                                                                                                                               |                |
|---------------------------------------------|-------------------------------------------------------------------------------------------------------------------------------------------------------------------------------|----------------|
| Plasmid name                                | Description                                                                                                                                                                   | Source         |
| p1R                                         | T7-lac inducible, ColE1 origin plasmid for expressing genes with N-terminally fused Strep-II tag.                                                                             | Addgene #29664 |
| p13SR                                       | T7-lac inducible, CloDF13 origin plasmid for expressing genes with N-terminally fused Strep-II tag.                                                                           | Addgene #48328 |
| pMS                                         | T7-lac inducible, RSF origin plasmid for expressing N-terminally 6X His-MBP-SUMO tagged genes.                                                                                | Addgene #64693 |
| pFGET19_Ulp1                                | Lac inducible plasmid for expression of 6X His tagged SUMO protease catalytic domain (Ulp1 <sub>403-621</sub> ).                                                              | Addgene #64697 |
| pMut89                                      | CloDF13 origin plasmid for expressing Wt (Cas1-2) under T7-lac inducible promoter and 5M (Cas1(Q24H, P202Q, G241D, E276D, L297Q)-Cas2) under Tetracycline Inducible promoter. | Addgene #80102 |
| pCSIR-T                                     | Plasmid containing CRISPR 2.1 array with 2 repeats                                                                                                                            | (4)            |
| pCas1-2[K]                                  | Plasmid expressing Cas1 and Cas2 of <i>E. coli</i> K-12 MG1655                                                                                                                | (4)            |
| p1R-IHF $\alpha\beta$                       | Plasmid expressing N-terminally Strep-II tagged IHF $\alpha$ and untagged IHF $\beta$ under T7-lac promoter.                                                                  | (5)            |
| p13SR-Cas1                                  | Plasmid expressing N-terminally Strep-II tagged Cas1 under T7-lac promoter.                                                                                                   | (5)            |
| pMS-Cas2                                    | Plasmid expressing N-terminally 6X His-MBP-SUMO tagged, C-terminally Strep-II tagged Cas2 under T7-lac promoter.                                                              | This study     |
| pCas1-2H                                    | Plasmid expressing Cas1 (Wt), C-terminally 6X His tagged Cas2 under T7-lac promoter.                                                                                          | This study     |
| p5M                                         | Plasmid expressing Cas1 (5M: Q24H, P202Q, G241D, E276D, L297Q), C-terminally 6X His tagged Cas2 under T7-lac promoter.                                                        | This study     |
| pY22A                                       | Plasmid expressing Cas1 (Y22A), C-terminally 6X His tagged Cas2 under T7-lac promoter.                                                                                        | This study     |
| p $\Delta$ C                                | Plasmid expressing Cas1 ( $\Delta$ C: $\Delta$ P279-S305), C-terminally 6X His tagged Cas2 under T7-lac promoter.                                                             | This study     |



|                 |                                                                                                                |                                                                                                                   |
|-----------------|----------------------------------------------------------------------------------------------------------------|-------------------------------------------------------------------------------------------------------------------|
| P33 F           | GCCCAATTTACTACTCGTTCTGGTGTTCCTCGT                                                                              | These oligos were annealed to prepare P33 prespacer. Whereas, P33 F oligo alone is used as P33[ss] prespacer.     |
| P33 R           | ACGAGAAACACCAGAACGAGTAGTAAATTGGGC                                                                              |                                                                                                                   |
| P23[5'5] F      | GCCCAATTTACTACTCGTTCTGGTGTTC                                                                                   | These oligos were annealed to prepare P23[5'-5] prespacer.                                                        |
| P23[5'5] R      | ACGAGAAACACCAGAACGAGTAGTAAAT                                                                                   |                                                                                                                   |
| P63 F           | CTCCGCGCTGTAG <b>AAG</b> TCACCATTGTTGTGCACGAC<br>GACATCATTCCGTGGCGTTATCCAGCT                                   | These oligos were annealed to prepare P63 prespacer (6). Residues corresponding to the PAM are depicted in green. |
| P63 R           | AGCTGGATAACGCCACGGAATGATGTCGTCGTGCAC<br>ACAATGGTG <b>ACTT</b> CTACAGCGCGGAG                                    |                                                                                                                   |
| P63mPAM F       | CTCCGCGCTGTAG <b>CCCTC</b> ACCACTGTTGTGCACGAC<br>GACACC <b>AGT</b> CCGTGGCGTTATCCAGCT                          | These oligos were annealed to prepare P63mPAM prespacer. Mutated residues in the oligo are represented in bold.   |
| P63mPAM R       | AGCTGGATAACGCCACG <b>ACTGGT</b> GTCGTCGTGCA<br>CAAC <b>AGTGGT</b> G <b>AGGG</b> CTACAGCGCGGAG                  |                                                                                                                   |
| P63 3'FAM-F     | CTCCGCGCTGTAG <b>AAG</b> TCACCATTGTTGTGCACGAC<br>GACATCATTCCGTGGCGTTATCCAGCT - <b>FAM(3')</b>                  | This oligo was annealed with P63 R to generate P63 T*.                                                            |
| P63 3'FAM-R     | AGCTGGATAACGCCACGGAATGATGTCGTCGTGCAC<br>ACAATGGTG <b>ACTT</b> CTACAGCGCGGAG - <b>FAM(3')</b>                   | This oligo was annealed with P63 F to generate P63 B*.                                                            |
| P63mPAM 3'FAM F | CTCCGCGCTGTAG <b>CCCTC</b> ACCACTGTTGTGCACGAC<br>GACACC <b>AGT</b> CCGTGGCGTTATCCAGCT - <b>FAM(3')</b>         | This oligo was annealed with P63mPAM R to generate P63mPAM T*.                                                    |
| P63mPAM 3'FAM R | AGCTGGATAACGCCACG <b>ACTGGT</b> GTCGTCGTGCA<br>CAAC <b>AGTGGT</b> G <b>AGGG</b> CTACAGCGCGGAG - <b>FAM(3')</b> | This oligo was annealed with P63mPAM F to generate P63mPAM B*.                                                    |

## References

1. Radovic, M., Killelea, T., Savitskaya, E., Wettstein, L., Bolt, E. L., and Ivancic-Bace, I. (2018) CRISPR-Cas adaptation in *Escherichia coli* requires RecBCD helicase but not nuclease activity, is independent of homologous recombination, and is antagonized by 5' ssDNA exonucleases. *Nucleic Acids Res.* **46**, 10173-10183
2. Robert, X., and Gouet, P. (2014) Deciphering key features in protein structures with the new ENDscript server. *Nucleic Acids Res.* **42**, W320-W324
3. Yosef, I., Goren, M. G., and Qimron, U. (2012) Proteins and DNA elements essential for the CRISPR adaptation process in *Escherichia coli*. *Nucleic Acids Res.* **40**, 5569-5576
4. Diez-Villasenor, C., Guzman, N. M., Almendros, C., Garcia-Martinez, J., and Mojica, F. J. (2013) CRISPR-spacer integration reporter plasmids reveal distinct genuine acquisition specificities among CRISPR-Cas I-E variants of *Escherichia coli*. *RNA Biol.* **10**, 792-802
5. Yoganand, K. N. R., Sivathanu, R., Nimkar, S., and Anand, B. (2017) Asymmetric positioning of Cas1–2 complex and Integration Host Factor induced DNA bending guide the unidirectional homing of protospacer in CRISPR-Cas type I-E system. *Nucleic Acids Res.* **45**, 367-381
6. Shipman, S. L., Nivala, J., Macklis, J. D., and Church, G. M. (2016) Molecular recordings by directed CRISPR spacer acquisition. *Science* **353**, aaf1175
